# Supplementary material for: Conformational landscapes of artificial peptides predicted by various force fields: are we ready to simulate β-amino acids?
Source: Royal Society of Chemistry journal article supplement (doi:10.1039/d2cp05998c), 2023-01-01
Supplement: d2cp05998c2.pdf [file d2cp05998c2.pdf]

Supplementary Information for

# Conformational Landscapes of Artificial Peptides Predicted by Various Force Fields: Are We Ready to Simulate $\beta$ -Amino Acids?

Jihye Park,<sup>a</sup> Hee-Seung Lee,<sup>a,b</sup> Hyungjun Kim,<sup>a\*</sup> Jeong-Mo Choi<sup>c\*</sup>

<sup>a</sup>Department of Chemistry, Korea Advanced Institute of Science and Technology (KAIST),  
Yuseong-gu, Daejeon 34141, Republic of Korea

<sup>b</sup>Center for Multiscale Chiral Architectures, KAIST, Yuseong-gu, Daejeon 34141, Republic of  
Korea

<sup>c</sup>Department of Chemistry and Chemistry Institute for Functional Materials, Pusan National  
University, Geumjeong-gu, Busan 46241, Republic of Korea

\* Correspondence to: H. Kim ([linus16@kaist.ac.kr](mailto:linus16@kaist.ac.kr)) and J.-M. Choi ([jmchoi@pusan.ac.kr](mailto:jmchoi@pusan.ac.kr))

This information supports the main manuscript and contains the following:

|                                                                                                                                                                                                                                                                                                                                                                                       |     |
|---------------------------------------------------------------------------------------------------------------------------------------------------------------------------------------------------------------------------------------------------------------------------------------------------------------------------------------------------------------------------------------|-----|
| Table S1. The temperatures used for replica exchange molecular dynamics (REMD) simulations of the vacuum systems.....                                                                                                                                                                                                                                                                 | 4   |
| Table S2. The temperatures used for REMD simulations of the methanol and water systems.....                                                                                                                                                                                                                                                                                           | 4   |
| Table S3. The p-value obtained by the t-test of $\phi - \theta$ distribution from hexamer simulations using different force fields and solvent conditions.....                                                                                                                                                                                                                        | 5   |
| Table S4. The p-value obtained by the t-test of $\psi - \theta$ distribution from hexamer simulations using different force fields and solvent conditions.....                                                                                                                                                                                                                        | 6   |
| Table S5. The average number of hydrogen bonds observed in vacuum, water, and methanol systems using different force field parameters. ....                                                                                                                                                                                                                                           | 7   |
| Table S6. The multivariate linear regression result with the Pearson's R value, $p$ -value, and fitting parameters $C_1$ , $C_2$ from the fitting model $y = C_1 \times N_{\text{intra-pep}} + C_2 \times N_{\text{sol-pep}} + K$ . ....                                                                                                                                              | 7   |
| Table S7. The partial charges of the water (upper) and methanol (lower) molecules in the force fields used in this work. ....                                                                                                                                                                                                                                                         | 8   |
|                                                                                                                                                                                                                                                                                                                                                                                       |     |
| Figure S1. The convergence test on the (a) PMF of ACPC monomer simulations with CHARMM36m force field, (b) PMF distribution of ACPC hexamer simulations with AMBER ff14SB force field in the aqueous system, and (c) $\omega$ distribution from aqueous systems. Overlap coefficients between the 15 ns, 20 ns, 30 ns, 40 ns, 50 ns, and 57 ns distribution were indicated as OC..... | 10  |
| Figure S2 Determination of the root-mean-squared deviation (RMSD) cutoff for clustering structures of ACPC monomer. We ran simulations for the vacuum system with (a) AMBER ff14SB, (b) CHARMM36m, and (c) OPLS-AA/L. The cutoff value of 0.5 Å is indicated with the dotted line.....                                                                                                | 111 |
| Figure S3. The RMSD of each structure to the average structure belongs to one cluster. ....                                                                                                                                                                                                                                                                                           | 122 |
| Figure S4. The probability distributions of the bootstrapped memory loss time (in ps). We ran simulations for four different solvent systems with AMBER ff14SB (left) and CHARMM36m (right): (a), (b) vacuum, (c), (d) water, (e), (f) methanol. The average and standard deviation are also shown. ....                                                                              | 133 |
| Figure S5. The potential energies of dihedral angles $\phi$ (blue), $\theta$ (orange) and $\psi$ (green) implemented in force fields (a) AMBER ff14SB, (b) CHARMM36m, and (c) OPLS-AA/L.....                                                                                                                                                                                          | 144 |

|                                                                                                                                                                                                                                                                                                                                                                             |     |
|-----------------------------------------------------------------------------------------------------------------------------------------------------------------------------------------------------------------------------------------------------------------------------------------------------------------------------------------------------------------------------|-----|
| Figure S6. RMSD values between the REMD sampled structure and DFT optimized global minimum structure for AMBER ff14SB (blue), CHARMM36m (orange), and OPLS-AA/L (green). .....                                                                                                                                                                                              | 166 |
| Figure S7. The distributions of average lengths of the helix pitch in the simulation data for the water system predicted by AMBER ff14SB (blue), CHARMM36m (orange), and OPLS-AA/L (green). .....                                                                                                                                                                           | 177 |
| Figure S8. The example snapshot of a denatured helix observed in the aqueous system with OPLS-AA/L. ....                                                                                                                                                                                                                                                                    | 188 |
| Figure S9. The $^3J_{\text{HN-H}\beta}$ coupling constant profile with corresponding $\phi$ angles ....                                                                                                                                                                                                                                                                     | 199 |
| Figure S10. The multivariate linear regression results between intra-peptide, solvent-peptide hydrogen bond, and the $\omega$ from the (a, b) AMBER ff14SB, and (c, d) CHARMM36m force field in the water and methanol solvated systems. ....                                                                                                                               | 20  |
| Figure S11. Coulombic (Coul) interaction energies between cyclopentane (CP) side chain, amide backbone groups (BB), and solvents. (a) Comparison of Coulombic interaction energy from the methanol system with AMBER ff14SB (violet) and CHARMM36m (orange). (b) Comparison of Coulombic interaction energies from the aqueous system with AMBER ff14SB and CHARMM36m. .... | 21  |

**Table S1.** The temperatures used for replica exchange molecular dynamics (REMD) simulations of the vacuum systems.

| <b>Temperature (K)</b> |     |     |     |     |     |     |     |     |     |
|------------------------|-----|-----|-----|-----|-----|-----|-----|-----|-----|
| 300                    | 310 | 325 | 350 | 375 | 400 | 425 | 450 | 475 | 500 |

**Table S2.** The temperatures used for REMD simulations of the methanol and water systems.

| <b>Temperature (K)</b> |     |     |     |     |     |     |     |     |     |
|------------------------|-----|-----|-----|-----|-----|-----|-----|-----|-----|
| 300                    | 305 | 310 | 315 | 320 | 325 | 330 | 335 | 340 | 345 |
| 350                    | 355 | 360 | 365 | 370 | 375 | 380 | 385 | 390 | 395 |
| 400                    | 405 | 410 | 415 | 420 | 425 | 430 | 435 | 440 | 445 |
| 450                    | 455 | 460 | 465 | 470 | 475 | 480 | 485 | 490 | 495 |
| 500                    |     |     |     |     |     |     |     |     |     |

**Table S3.** The p-value obtained by the t-test of  $\phi - \theta$  distribution from hexamer simulations using different force fields and solvent conditions.

|                          | CHARM  | OPLS-  | AMBER    | CHARM    | OPLS-    | AMBER  | CHARM | OPLS- |
|--------------------------|--------|--------|----------|----------|----------|--------|-------|-------|
| $\phi - \theta$          | M36m   | AA/L   | ff14SB   | M36m     | AA/L     | ff14SB | M36m  | AA/L  |
|                          | vacuum | vacuum | methanol | methanol | methanol | water  | water | water |
| AMBER ff14SB<br>vacuum   | 0.097  | 0.097  | 0.347    | 0.101    | 0.266    | 0.045  | 0.088 | 0.422 |
| CHARMM36m<br>vacuum      |        | 0.088  | 0.069    | 0.272    | 0.128    | 0.031  | 0.129 | 0.089 |
| OPLS-AA/L<br>vacuum      |        |        | 0.094    | 0.099    | 0.188    | 0.147  | 0.098 | 0.273 |
| AMBER ff14SB<br>methanol |        |        |          | 0.061    | 0.227    | 0.036  | 0.062 | 0.405 |
| CHARMM36m<br>methanol    |        |        |          |          | 0.125    | 0.019  | 0.178 | 0.092 |
| OPLS-AA/L<br>methanol    |        |        |          |          |          | 0.099  | 0.151 | 0.259 |
| AMBER ff14SB<br>water    |        |        |          |          |          |        | 0.017 | 0.195 |
| CHARMM36m<br>water       |        |        |          |          |          |        |       | 0.074 |

**Table S4.** The p-value obtained by the t-test of  $\psi - \theta$  distribution from hexamer simulations using different force fields and solvent conditions.

|                 | CHARM  | OPLS-  | AMBER    | CHARM    | OPLS-    | AMBER  | CHARM | OPLS- |
|-----------------|--------|--------|----------|----------|----------|--------|-------|-------|
| $\psi - \theta$ | M36m   | AA/L   | ff14SB   | M36m     | AA/L     | ff14SB | M36m  | AA/L  |
|                 | vacuum | vacuum | Methanol | Methanol | Methanol | Water  | Water | Water |
| AMBER ff14SB    | 0.131  | 0.137  | 0.172    | 0.135    | 0.105    | 0.038  | 0.110 | 0.109 |
| vacuum          |        |        |          |          |          |        |       |       |
| CHARMM36m       |        | 0.163  | 0.175    | 0.140    | 0.126    | 0.108  | 0.126 | 0.107 |
| vacuum          |        |        |          |          |          |        |       |       |
| OPLS-AA/L       |        |        | 0.152    | 0.168    | 0.193    | 0.206  | 0.184 | 0.132 |
| vacuum          |        |        |          |          |          |        |       |       |
| AMBER ff14SB    |        |        |          | 0.112    | 0.155    | 0.055  | 0.068 | 0.074 |
| Methanol        |        |        |          |          |          |        |       |       |
| CHARMM36m       |        |        |          |          | 0.246    | 0.127  | 0.362 | 0.189 |
| Methanol        |        |        |          |          |          |        |       |       |
| OPLS-AA/L       |        |        |          |          |          | 0.190  | 0.242 | 0.177 |
| Methanol        |        |        |          |          |          |        |       |       |
| AMBER ff14SB    |        |        |          |          |          |        | 0.117 | 0.237 |
| Water           |        |        |          |          |          |        |       |       |
| CHARMM36m       |        |        |          |          |          |        |       | 0.227 |
| Water           |        |        |          |          |          |        |       |       |

**Table S5.** The average number of hydrogen bonds observed in vacuum, water, and methanol systems using different force field parameters.

| System<br>H-bonds type | Vacuum                 |                      | Water                  |                      | Methanol               |                      |
|------------------------|------------------------|----------------------|------------------------|----------------------|------------------------|----------------------|
|                        | $N_{\text{intra-pep}}$ | $N_{\text{sol-pep}}$ | $N_{\text{intra-pep}}$ | $N_{\text{sol-pep}}$ | $N_{\text{intra-pep}}$ | $N_{\text{sol-pep}}$ |
| AMBER<br>ff14SB        | 2.00                   | X                    | 0.97                   | 4.68                 | 1.39                   | 3.83                 |
| CHARMM36m              | 0.88                   | X                    | 0.60                   | 3.97                 | 0.86                   | 2.50                 |
| OPLS-AA/L              | 0.97                   | X                    | 0.01                   | 7.35                 | 0.80                   | 0.01                 |

**Table S6.** The multivariate linear regression result with the Pearson's R value,  $p$ -value, and fitting parameters  $C_1$ ,  $C_2$  from the fitting model  $y = C_1 \times N_{\text{intra-pep}} + C_2 \times N_{\text{sol-pep}} + K$ .

| Force<br>Field  | Solvent  | $R$   | $p$ -value<br>(K) | $p$ -value<br>( $C_1$ )   | $p$ -value<br>( $C_2$ )   | $C_1$ | $C_2$  |
|-----------------|----------|-------|-------------------|---------------------------|---------------------------|-------|--------|
| AMBER<br>ff14SB | Methanol | 0.314 | 0.000             | 2.32<br>$\times 10^{-55}$ | 9.48<br>$\times 10^{-52}$ | 2.746 | -1.547 |
| AMBER<br>ff14SB | Water    | 0.175 | 0.000             | 3.36<br>$\times 10^{-26}$ | 2.50<br>$\times 10^{-10}$ | 2.651 | -0.734 |
| CHARMM<br>36m   | Methanol | 0.243 | 0.000             | 4.23<br>$\times 10^{-52}$ | 1.08<br>$\times 10^{-19}$ | 3.664 | -1.263 |
| CHARMM<br>36m   | Water    | 0.113 | 0.000             | 1.09<br>$\times 10^{-10}$ | 1.58<br>$\times 10^{-6}$  | 1.625 | -0.487 |

**Table S7.** The partial charges of the water (upper) and methanol (lower) molecules in the force fields used in this work.

| Atom | TIP3P  |
|------|--------|
| O    | -0.834 |
| H    | 0.417  |

| Atom | AMBER ff14SB | CHARMM36m | OPLS-AA/L |
|------|--------------|-----------|-----------|
| O    | -0.5988      | -0.650    | -0.4826   |
| H(O) | 0.396        | 0.419     | 0.4057    |
| C    | 0.1167       | -0.039    | 0.1483    |
| H(C) | 0.0287       | 0.09      | -0.0238   |



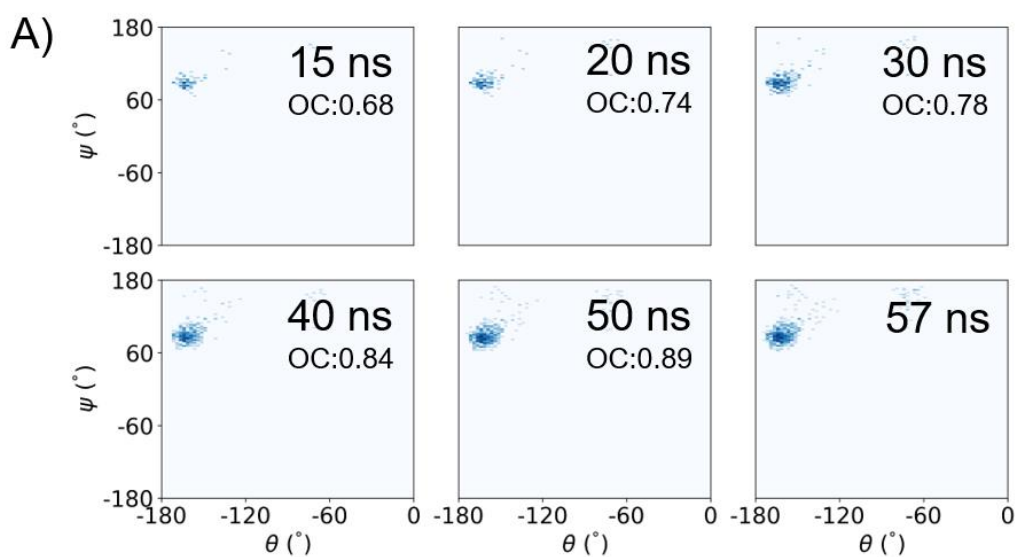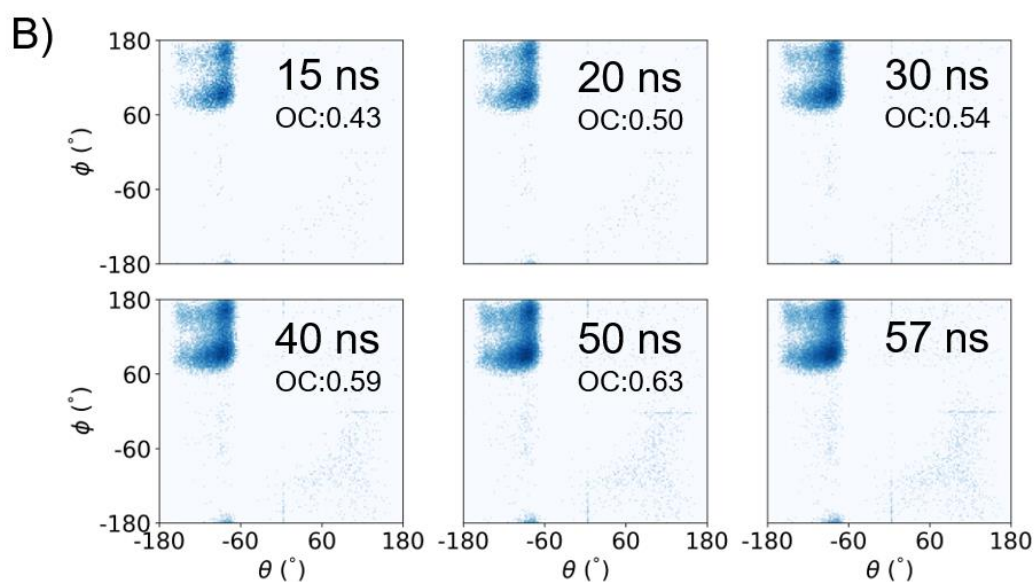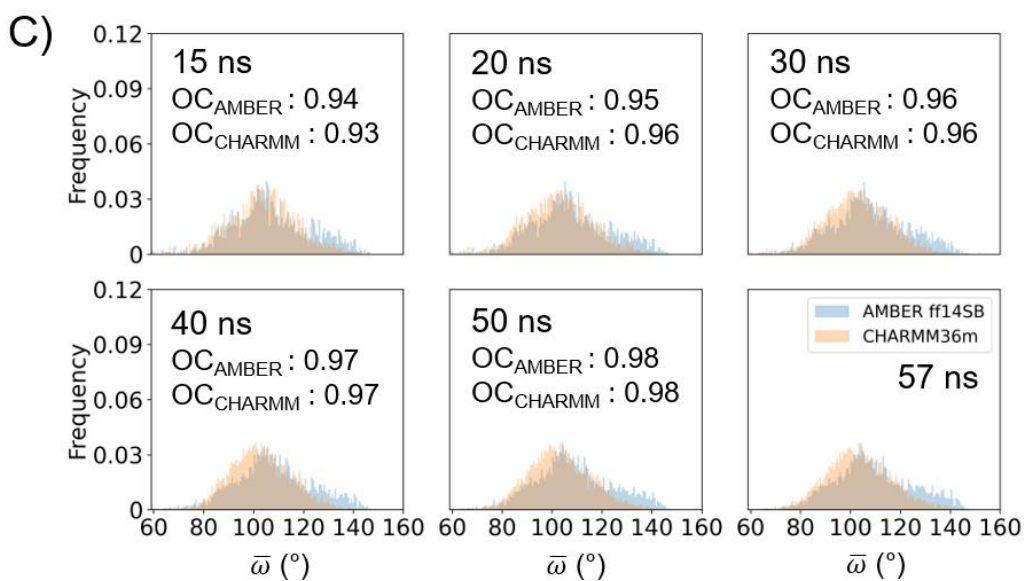

**Figure S1.** The convergence test on the (a) PMF of ACPC monomer simulations with CHARMM36m force field, (b) PMF distribution of ACPC hexamer simulations with AMBER ff14SB force field in the aqueous system, and (c)  $\bar{\omega}$  distribution from aqueous systems. Overlap coefficients between the 15 ns, 20 ns, 30 ns, 40 ns, 50 ns, and 57 ns distribution were indicated as OC.

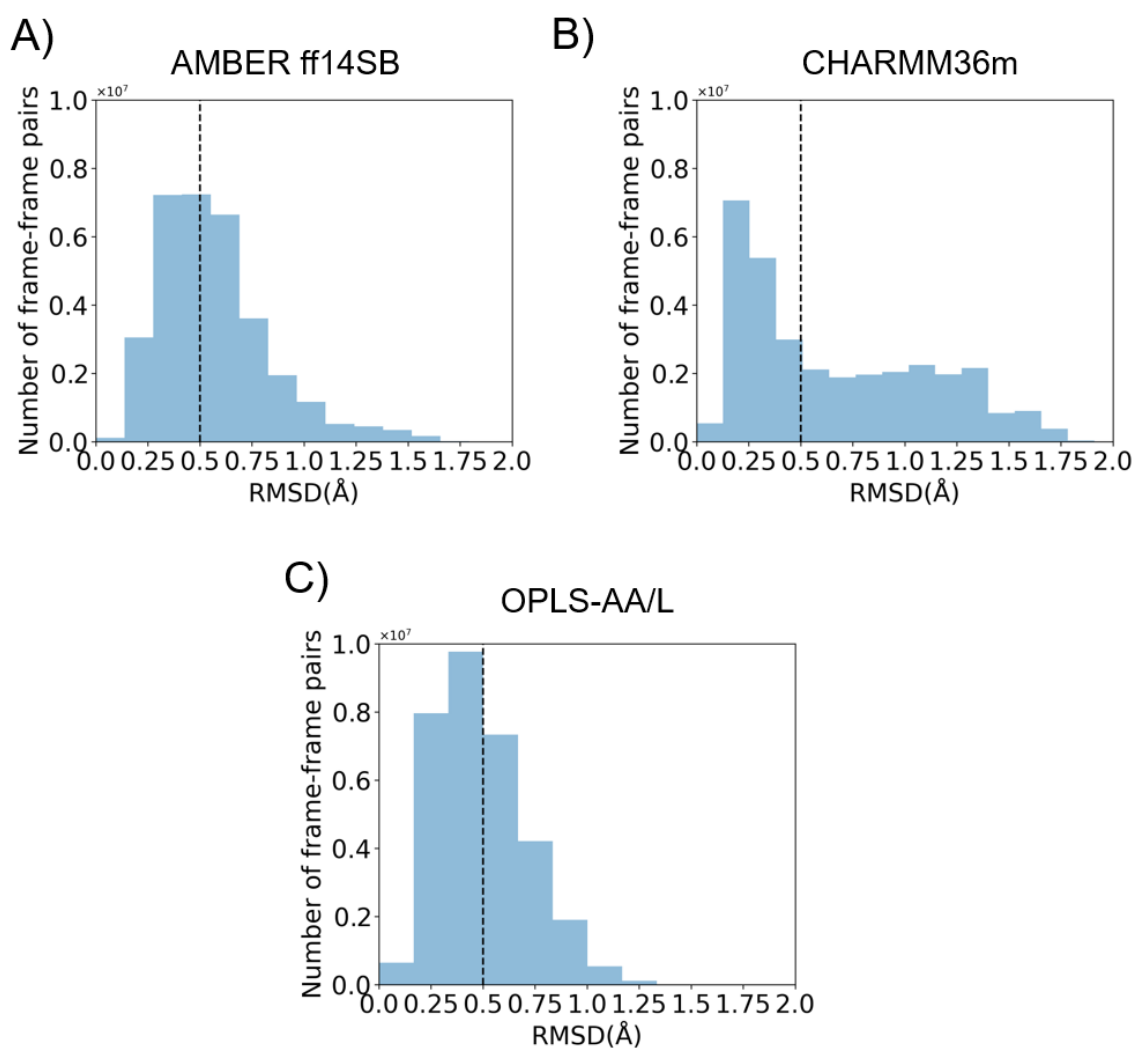

**Figure S2.** Determination of the root-mean-squared deviation (RMSD) cutoff for clustering structures of ACPC monomer. We ran simulations for the vacuum system with (a) AMBER ff14SB, (b) CHARMM36m, and (c) OPLS-AA/L. The cutoff value of 0.5 Å is indicated with the dotted line.

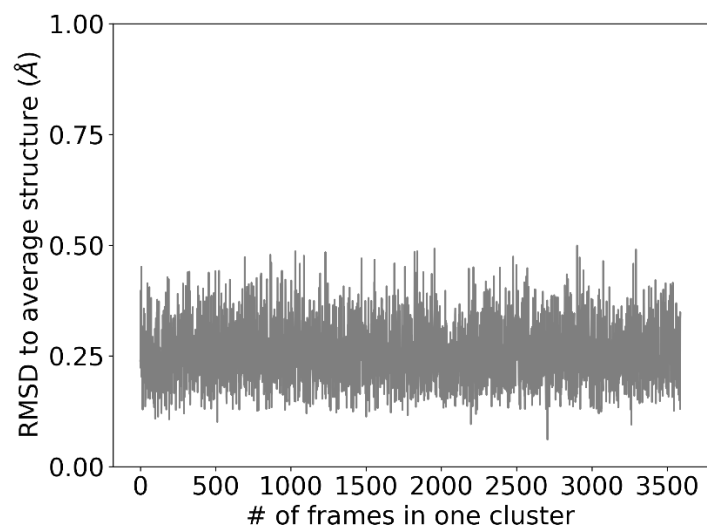

**Figure S3.** The RMSD of each structure to the average structure belongs to one cluster.

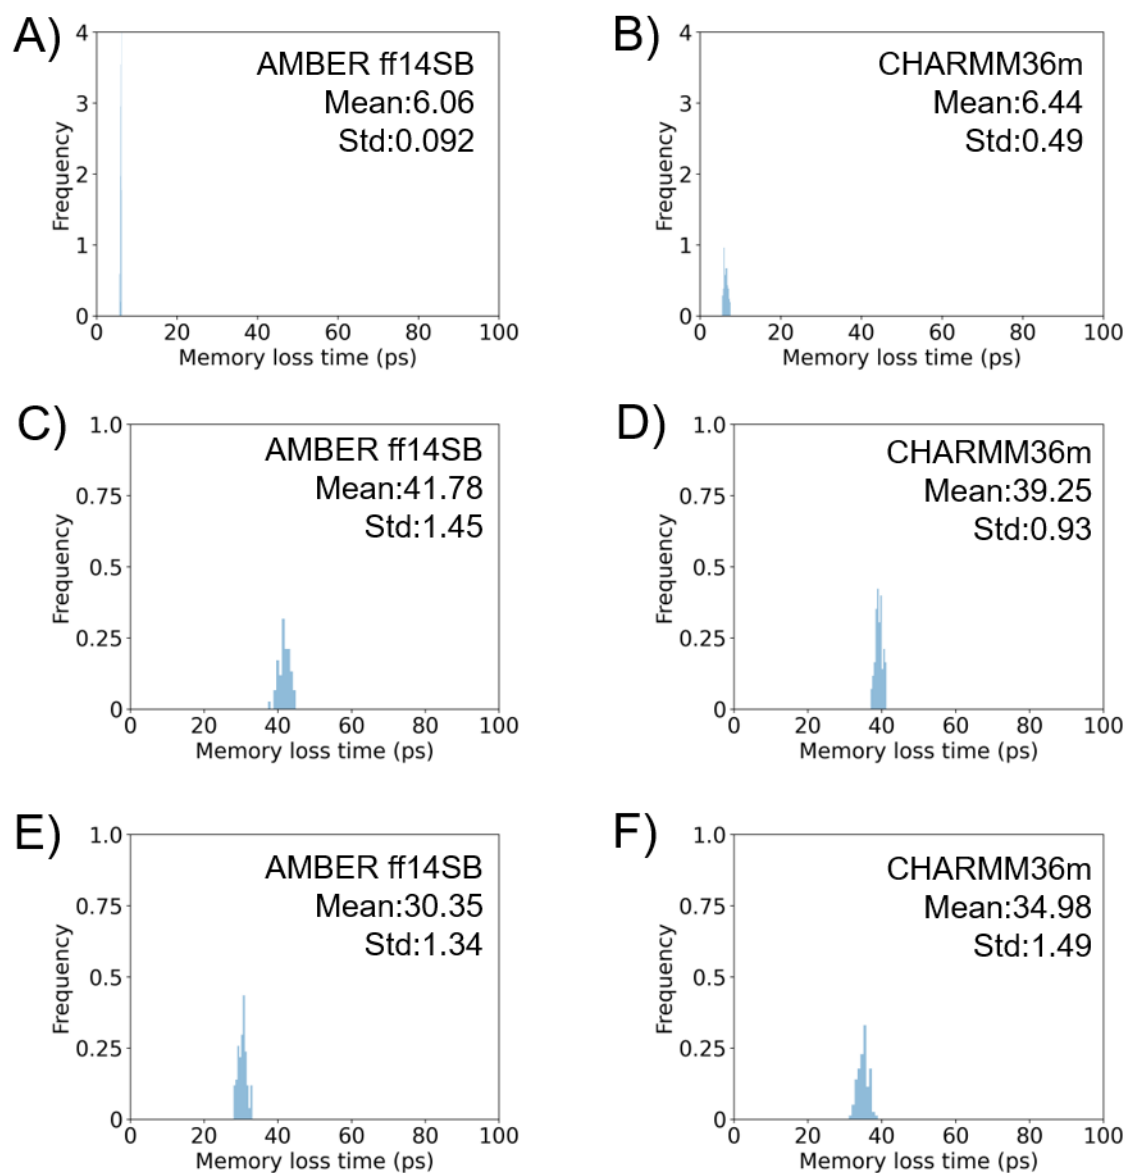

**Figure S4.** The probability distributions of the bootstrapped memory loss time (in ps). We ran simulations for four different solvent systems with AMBER ff14SB (left) and CHARMM36m (right): (a), (b) vacuum, (c), (d) water, (e), (f) methanol. The average and standard deviation are also shown.

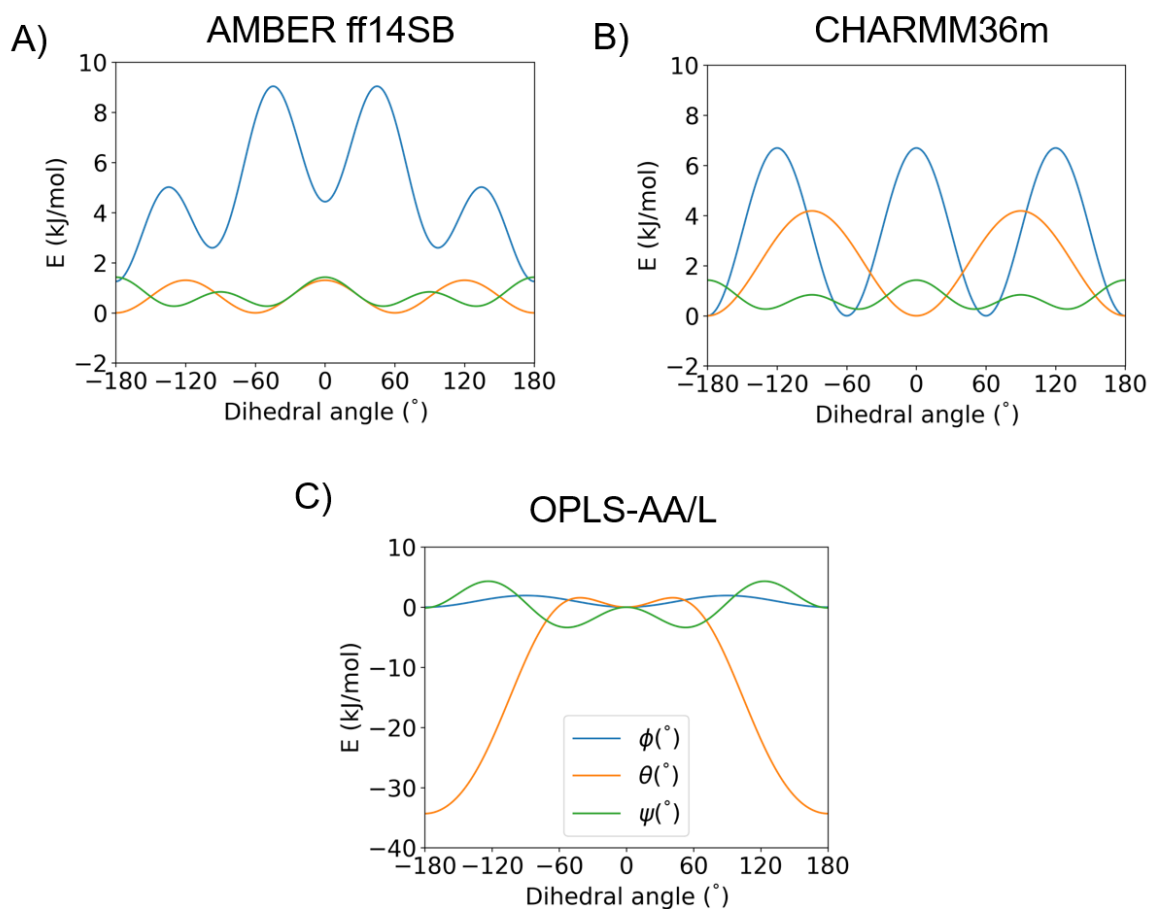

**Figure S5.** The potential energies of dihedral angles  $\phi$  (blue),  $\theta$  (orange) and  $\psi$  (green) implemented in force fields (a) AMBER ff14SB, (b) CHARMM36m, and (c) OPLS-AA/L.

The functional forms of dihedral potential energies from force field parameters are as following:

AMBER ff14SB:

$$E(\phi) = 2.21752(1 + \cos \phi) + 0.6276(1 + \cos(3\phi - 180)) + 2.092(1 + \cos(4\phi - 180))$$

$$E(\theta) = 0.650844(1 + \cos 3\theta)$$

$$E(\psi) = 0.29288(1 + \cos 2\psi) + 0.4184 (1 + \cos 4\psi)$$

CHARMM36m:

$$E(\phi) = 3.3472(1 + \cos 3\phi)$$

$$E(\theta) = 2.092(1 + \cos(2\theta - 180))$$

$$E(\psi) = 0.29288(1 + \cos 2\psi) + 0.4184 (1 + \cos 4\psi)$$

OPLS-AA/L:

$$E(\phi) = 1.93 - 1.933 \cos^2 \phi$$

$$E(\theta) = -8.79 + 23.849 \cos \theta - 8.368 \cos^2 \theta - 6.694 \cos^3 \theta$$

$$E(\psi) = 0.73 - 9.985 \cos \psi - 0.791 \cos^2 \psi + 10.042 \cos^3 \psi$$

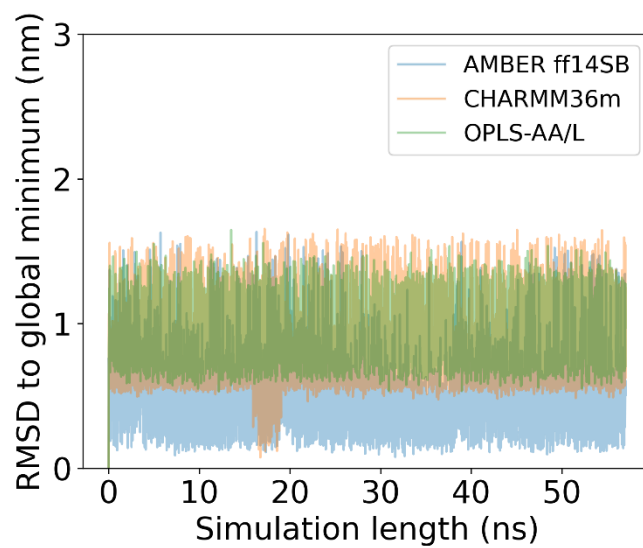

**Figure S6.** RMSD values between the REMD sampled structure and DFT optimized global minimum structure for AMBER ff14SB (blue), CHARMM36m (orange), and OPLS-AA/L (green).



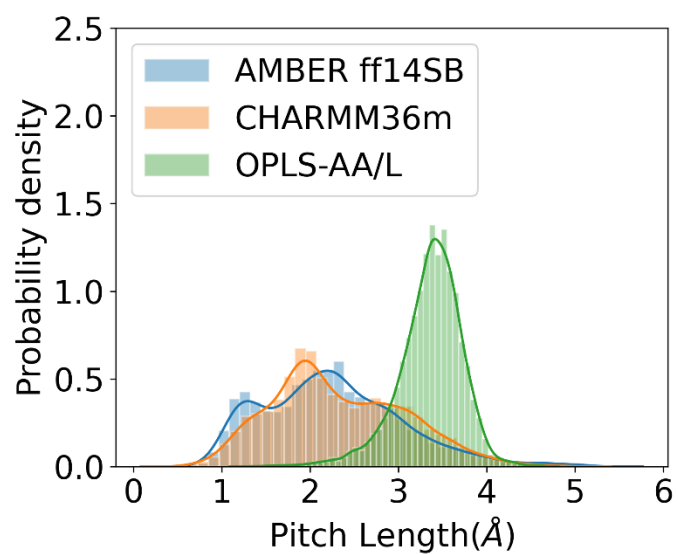

**Figure S7.** The distributions of average lengths of the helix pitch in the simulation data for the water system predicted by AMBER ff14SB (blue), CHARMM36m (orange), and OPLS-AA/L (green).

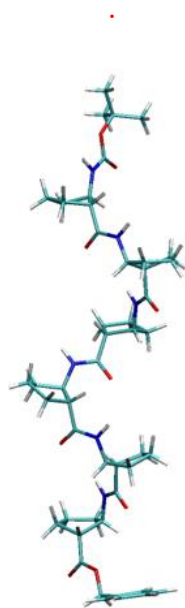

**Figure S8.** The example snapshot of a denatured helix observed in the aqueous system with OPLS-AA/L.

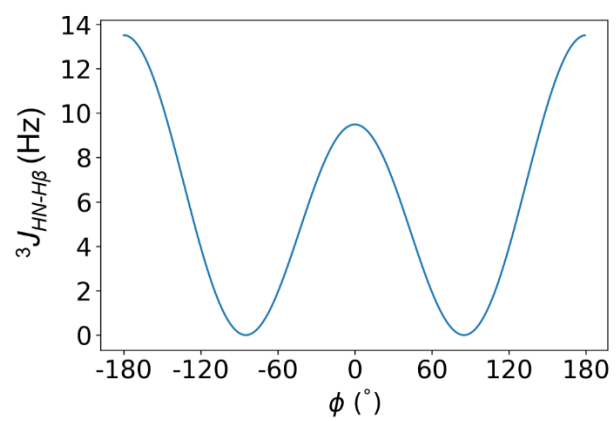

**Figure S9.** The  ${}^3J_{\text{HN-H}\beta}$  coupling constant profile with corresponding  $\phi$  angles

A) AMBER ff14SB Water

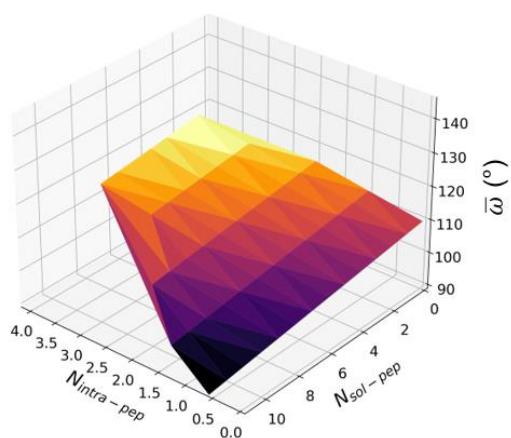

B) AMBER ff14SB Methanol

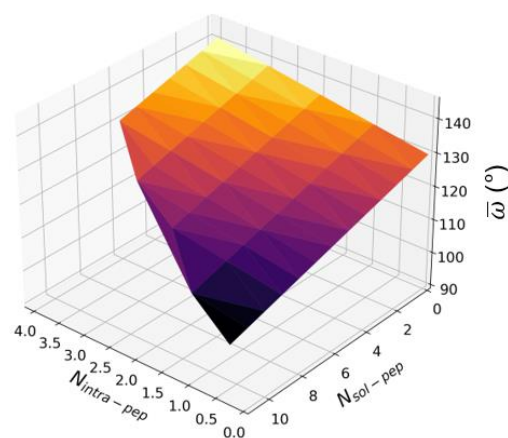

C) CHARMM36m Water

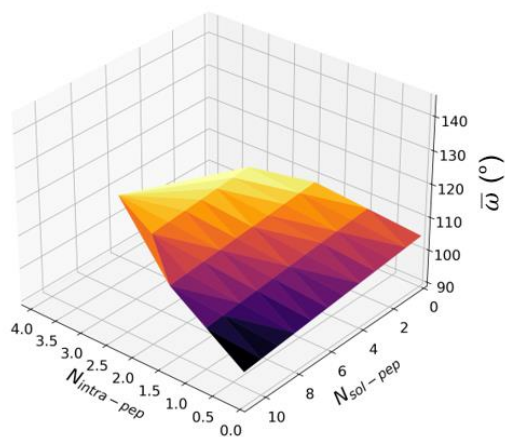

D) CHARMM36m Methanol

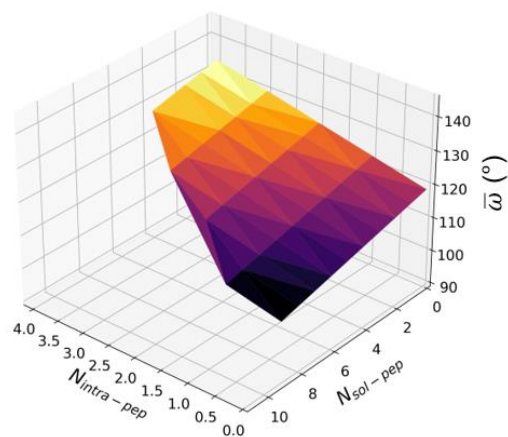

**Figure S10.** The multivariate linear regression results between intra-peptide, solvent-peptide hydrogen bond, and the  $\bar{\omega}$  from the (a, b) AMBER ff14SB, and (c, d) CHARMM36m force field in the water and methanol solvated systems.

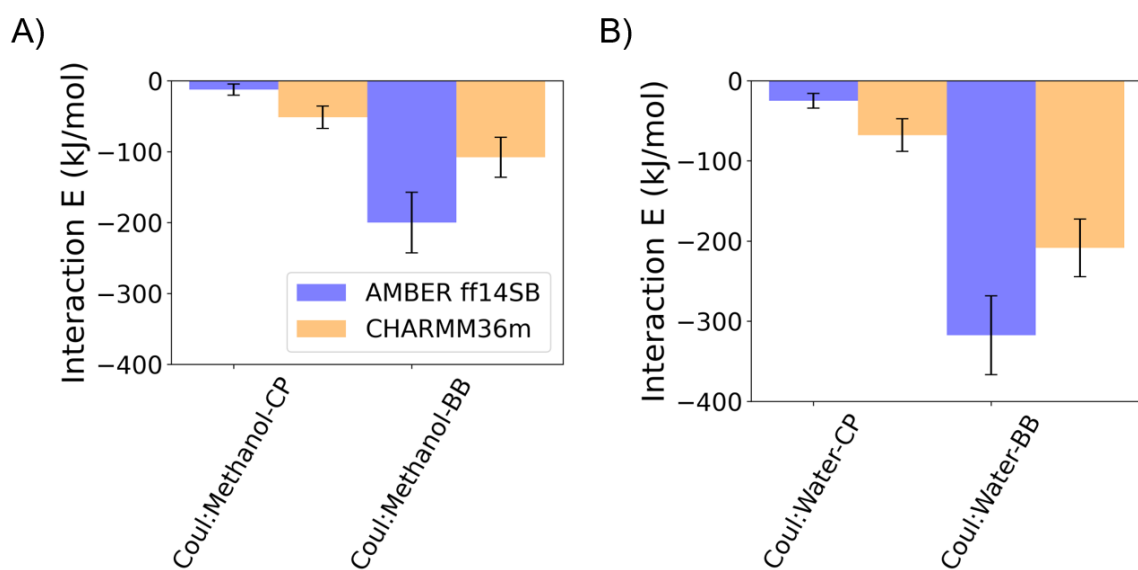

**Figure S11.** Coulombic (Coul) interaction energies between cyclopentane (CP) side chain, amide backbone groups (BB), and solvents. (a) Comparison of Coulombic interaction energy from the methanol system with AMBER ff14SB (violet) and CHARMM36m (orange). (b) Comparison of Coulombic interaction energies from the aqueous system with AMBER ff14SB and CHARMM36m.
